# Supplementary material
Source: publisher site journal article supplement (https://www.dovepress.com/article/183796)
Supplement: Supplementary file 1 [file get_supplementary_file.php]

## Supplementary materials

Fig.S1 Synthetic scheme of (A) Phe-TPGS and (B) Val-TPGS.

Fig.S2 <sup>1</sup>H-NMR spectra of (A) Cbz-Phe-TPGS, (B) Cbz-Val-TPGS, (C) Phe-TPGS and (D) Val-TPGS (ppm, in CDCl<sub>3</sub>).

Fig. S3 The CMC of Val-TPGS, Phe-TPGS and TPGS using pyrene fluorescence technique. Intensity ratios of excitation  $I_{375}/I_{386}$  are plotted with logarithm of copolymer concentration at emission of 338 nm. (Final concentration of pyrene was set  $3 \times 10^{-7}$  mol/L).

Fig.S4 (A) the size distribution of TP-PMs and Val-PMs. (B) TEM of TP-PMs and Val-PMs (scale bar= 50 nm).

Fig. S5 The storage stability of Cur-PMs at 4 °C and room temperature over 15 days. The changes of (A) the particle size and (B) the content of Cur-PMs over 15 days (Mean±SD, n=3).

Fig. S6 The endocytosis mechanism of (A) Phe-PMs and (B) TP-PMs in LP cells (Mean±SD, n=3, \*\*P<0.01 vs control).

Table S1 Pharmacokinetic parameters of Cur after oral administration of Cur-PMs in cycloheximide (CHM) treated rats (n=3).

Table S2 Pharmacokinetic parameters of Cur in rats after oral administration of Cur-Sol, TP-PMs, Val-PMs and Phe-PMs (n=5).

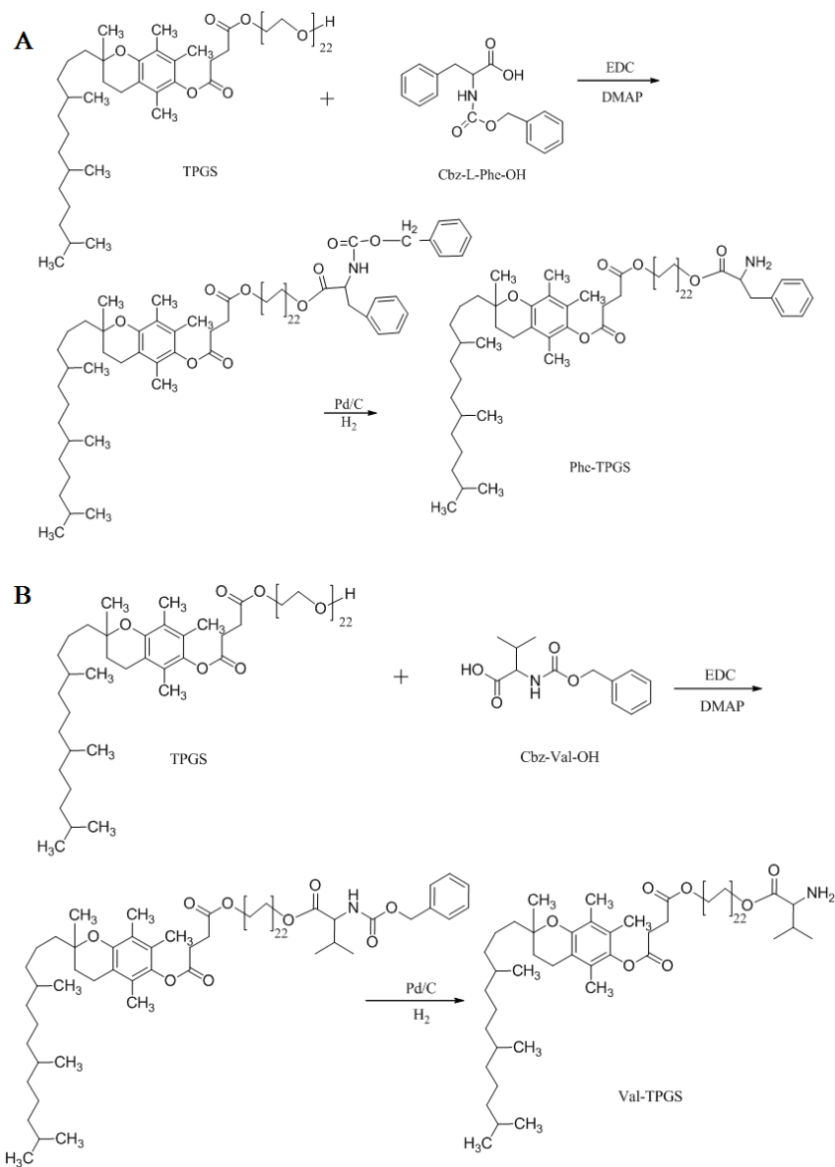

Fig.S1 Synthetic scheme of (A) Phe-TPGS and (B) Val-TPGS.

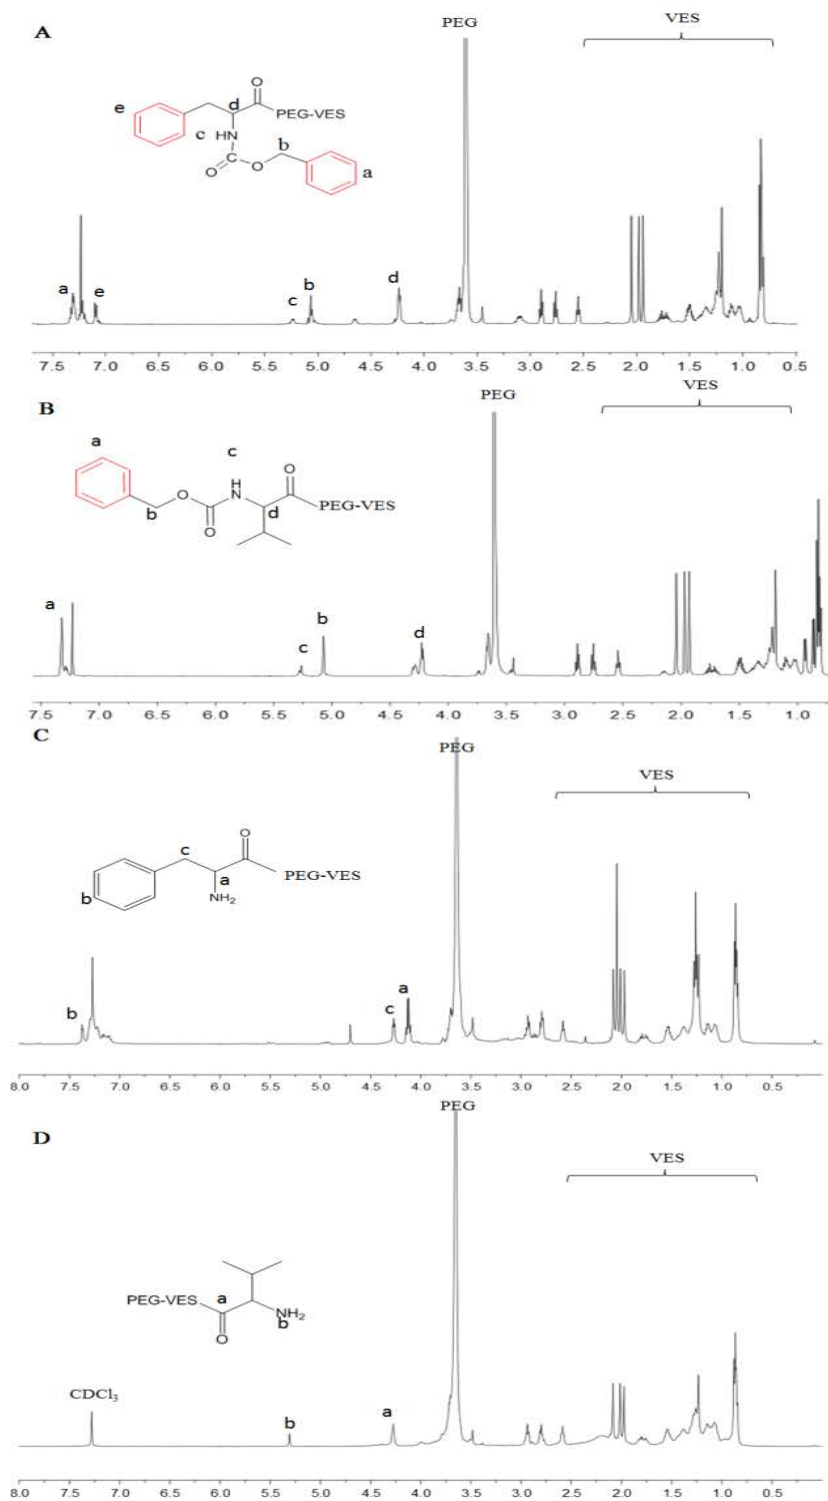

Fig.S2  $^1\text{H-NMR}$  spectra of (A) Cbz-Phe-TPGS, (B) Cbz-Val-TPGS, (C) Phe-TPGS and (D) Val-TPGS (ppm, in  $\text{CDCl}_3$ ).

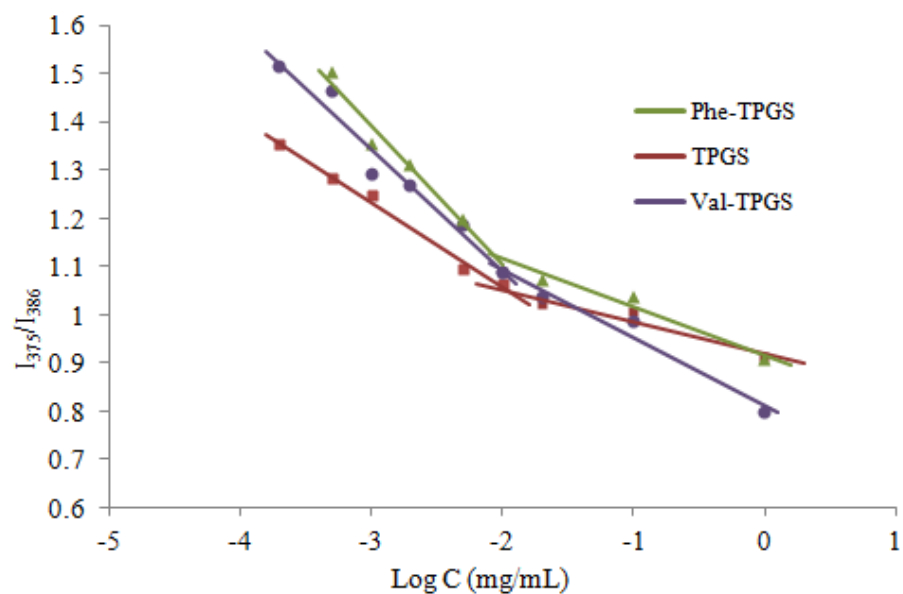

Fig. S3 The CMC of Val-TPGS, Phe-TPGS and TPGS using pyrene fluorescence technique. Intensity ratios of excitation  $I_{375}/I_{386}$  are plotted with logarithm of copolymer concentration at emission of 338 nm. (Final concentration of pyrene was set  $3 \times 10^{-7}$  mol/L).

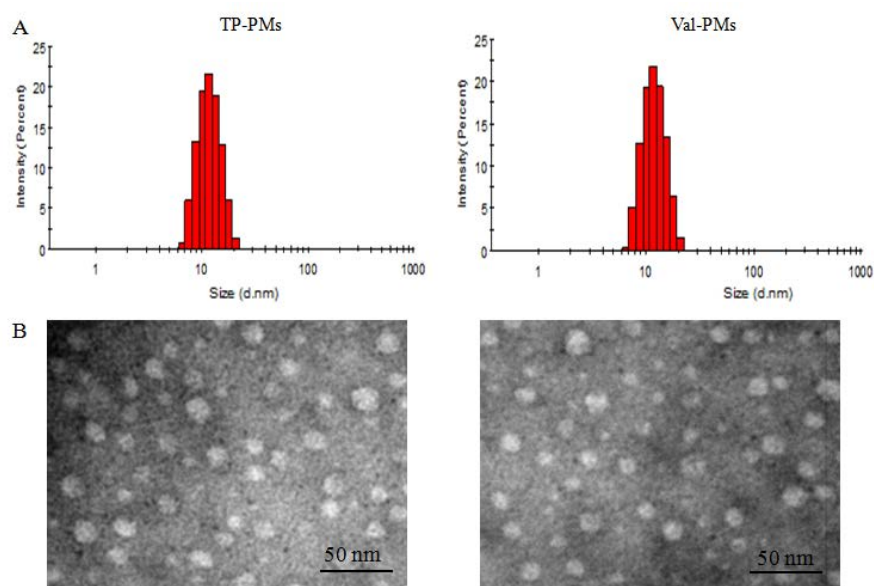

Fig.S4 (A) the size distribution of TP-PMs and Val-PMs. (B) TEM of TP-PMs and Val-PMs (scale bar= 50 nm).

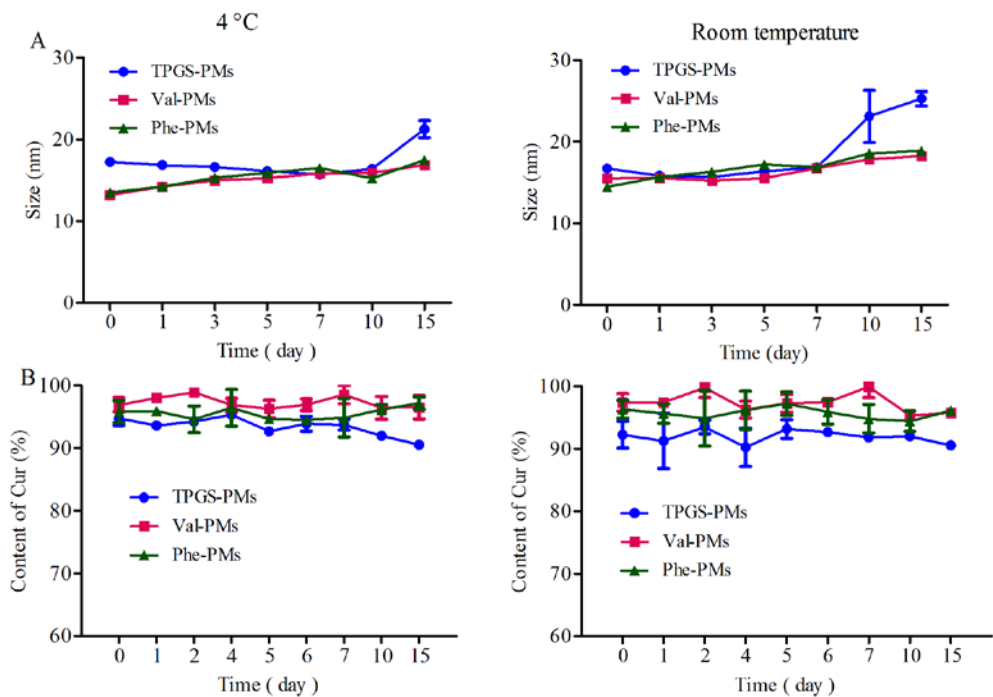

Fig. S5 The storage stability of Cur-PMs at 4 °C and room temperature over 15 days. The changes of (A) the particle size and (B) the content of Cur-PMs over 15 days (Mean±SD, n=3).

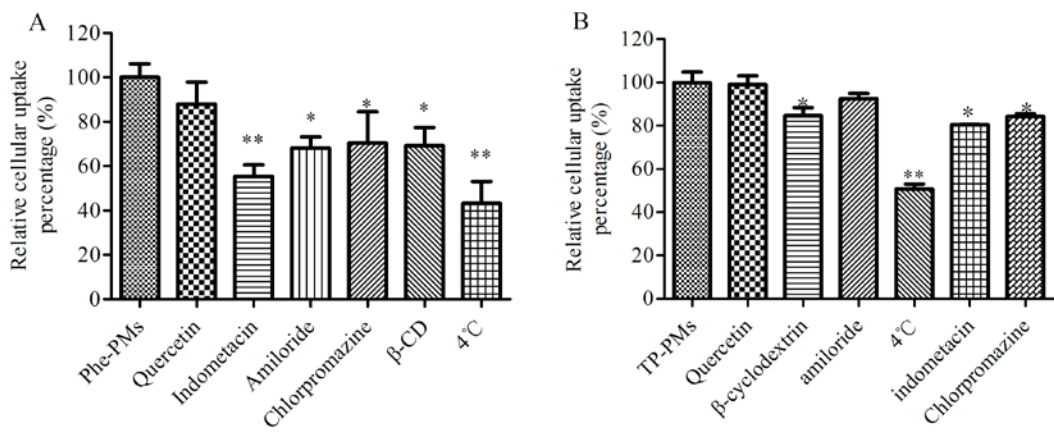

Fig. S6 The endocytosis mechanism of (A) Phe-PMs and (B) TP-PMs in LP cells (Mean±SD, n=3, \*P<0.01 vs control).

Table S1 Pharmacokinetic parameters of Cur after oral administration of Cur-PMs in cylcoheximide (CHM) treated rats (n=3).

|                       |             | TP-PMs            | Val-PMs            | Phe-PMs           | TP-PMs+<br>CHM   | Val-PMs+<br>CHM  | Phe-PMs+<br>CHM  |
|-----------------------|-------------|-------------------|--------------------|-------------------|------------------|------------------|------------------|
| AUC <sub>(0-2h)</sub> | μg/L<br>*h  | 200.86±41.<br>84  | 558.80±128.<br>15  | 496.06±67.<br>02  | 139.99±15<br>.55 | 225.04±25<br>.93 | 235.37±11<br>.56 |
| AUC <sub>(0-∞)</sub>  | μg/L<br>*h  | 212.33±41.<br>37  | 1150.04±93<br>1.81 | 679.84±15<br>6.52 | 162.21±30<br>.65 | 319.84±27<br>.92 | 324.24±70<br>.85 |
| t <sub>1/2</sub>      | h           | 0.55±0.43         | 1.77±1.85          | 1.06±0.22         | 0.67±0.25        | 1.32±0.37        | 1.20±0.69        |
| T <sub>max</sub>      | h           | 0.25±0.00         | 1.77±1.86          | 0.28±0.05         | 0.30±0.05        | 0.28±0.05        | 0.25±0.00        |
| CL                    | L/h/kg<br>g | 241.57±47.<br>17  | 64.31±40.86        | 75.92±15.4<br>6   | 316.02±62<br>.06 | 157.14±13<br>.99 | 159.13±34<br>.04 |
| V                     | L/kg        | 187.85±14<br>6.63 | 97.28±26.27        | 113.96±19.<br>87  | 290.95±73<br>.11 | 294.90±72<br>.02 | 254.04±92<br>.18 |
| C <sub>max</sub>      | μg/L        | 331.33±13.<br>20  | 574.00±30.1<br>2   | 555.67±58.<br>07  | 224.00±17<br>.78 | 326.00±64<br>.82 | 355.67±70<br>.50 |

Table S2 Pharmacokinetic parameters of Cur in rats after oral administration of Cur-Sol, TP-PMs, Val-PMs and Phe-PMs (n=5).

|                        |            | Cur-Sol             | TP-PMs             | Val-PMs              | Phe-PMs              |
|------------------------|------------|---------------------|--------------------|----------------------|----------------------|
| AUC <sub>(0-12h)</sub> | μg/L*<br>h | 122.45±12.76        | 383.80±110.13      | 1232.94±383.87*<br>* | 1296.14±271.61*<br>* |
| AUC <sub>(0-∞)</sub>   | μg/L*<br>h | 204.28±112.64       | 426.14±92.82       | 1268.39±271.61*<br>* | 1323.15±261.08*<br>* |
| t <sub>1/2</sub>       | h          | 0.42±0.026          | 1.03±0.34          | 2.01±0.81*           | 1.67±0.53*           |
| T <sub>max</sub>       | h          | 0.33±0.00           | 0.25±0.00          | 0.26±0.03            | 0.25±0.00            |
| CL                     | L/h/kg     | 290.86±107.72       | 121.63±23.95       | 43.27±12.52          | 39.63±8.36           |
| V                      | L/kg       | 2367.31±1774.7<br>3 | 1008.71±571.8<br>6 | 137.78±88.20         | 99.53±45.90          |
| C <sub>max</sub>       | μg/L       | 44.32±10.99         | 348±20.95          | 583.67±49.93**       | 597.5±42.29**        |
